# Supplementary material for: Delta rhythmicity is a reliable EEG biomarker in Angelman syndrome: a parallel mouse and human analysis
Source: Springer Nature journal article supplement (doi:10.1186/s11689-017-9195-8), 2017-05-08

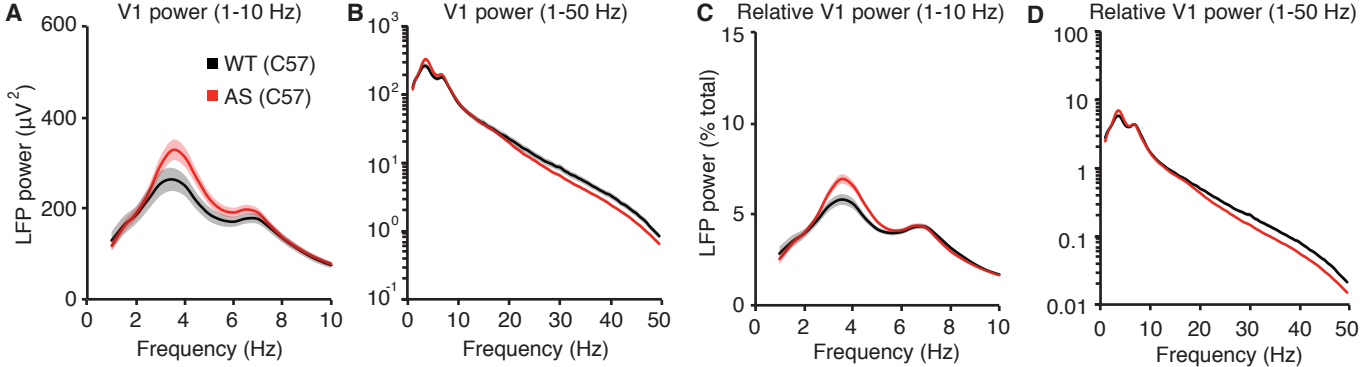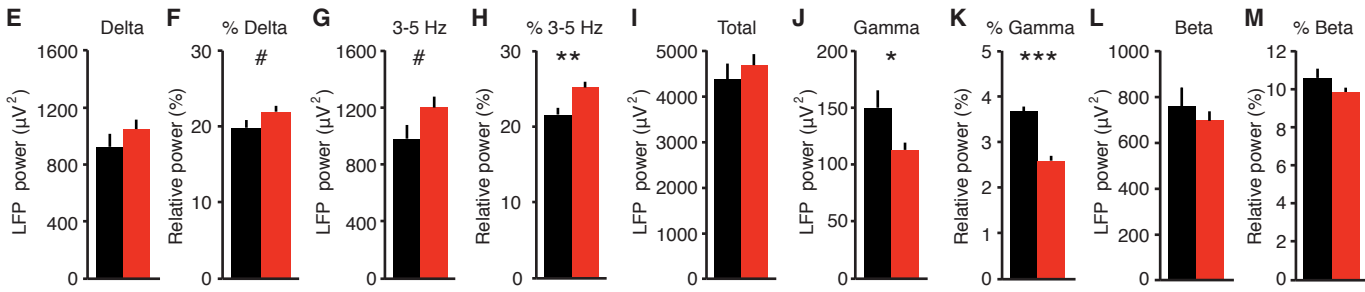

Supplement: MOESM2 [file 12272430]
