# Supplementary material for: Delta rhythmicity is a reliable EEG biomarker in Angelman syndrome: a parallel mouse and human analysis
Source: Springer Nature journal article supplement (doi:10.1186/s11689-017-9195-8), 2017-05-08

**A** Generalized delta (5 yo/wake)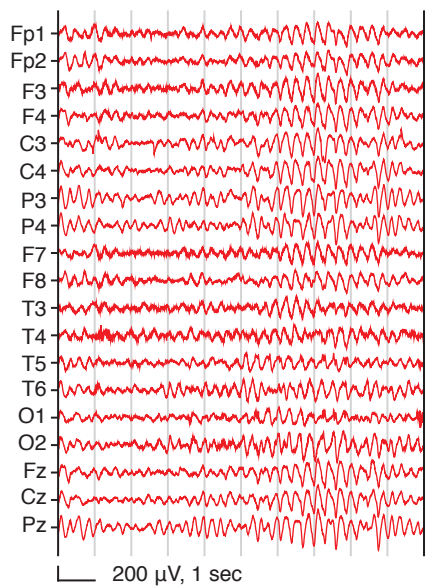**B** Generalized delta (5 yo/wake)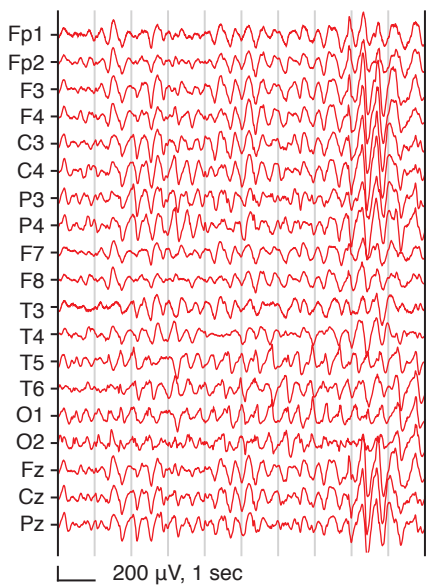**C** Generalized delta (6 yo/sleep)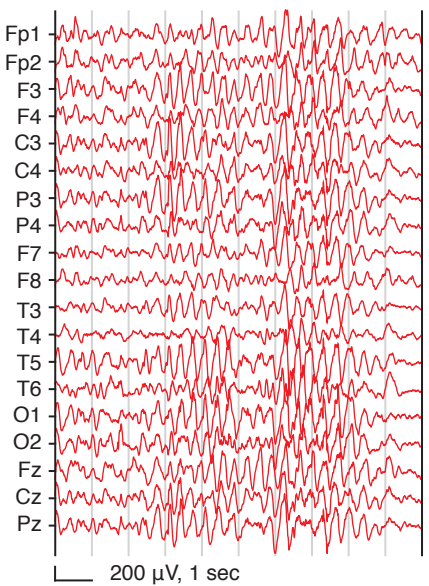**D** Posterior delta (6 yo/wake)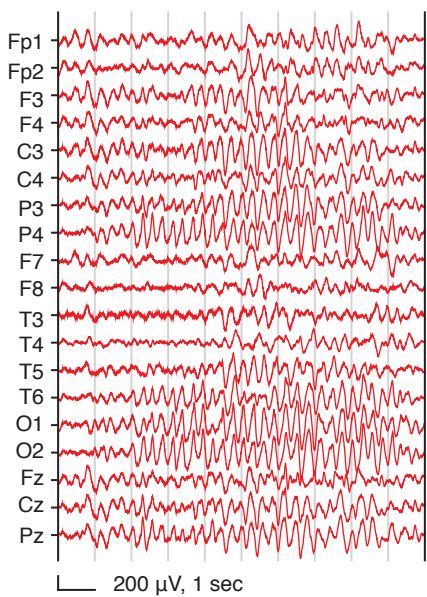**E** Frontal delta (7 yo/wake)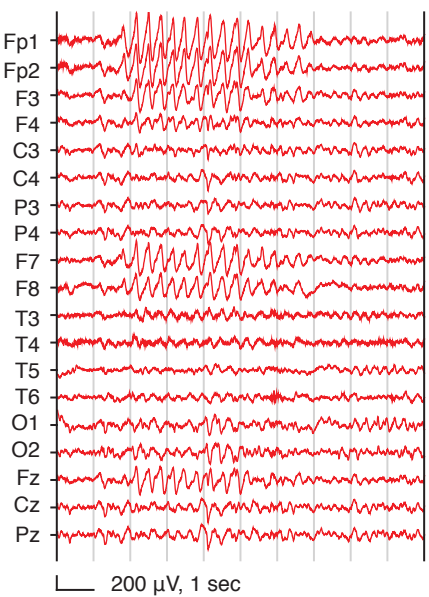**F** Frontal delta (8 yo/wake)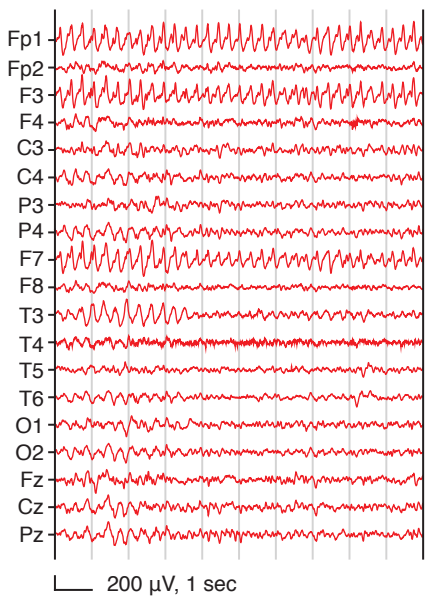**G** "Notched" delta (5 yo/wake)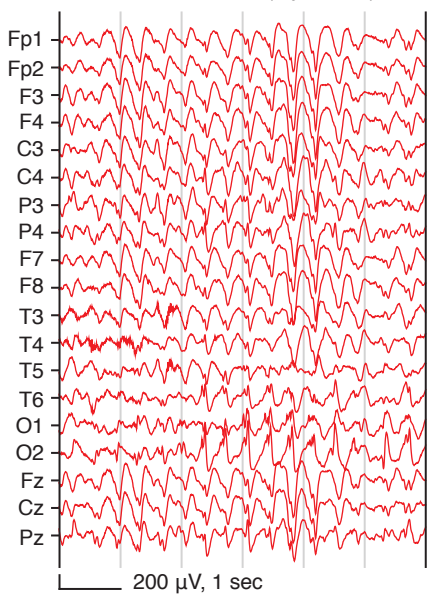**H** "Notched" delta (4 yo/sleep)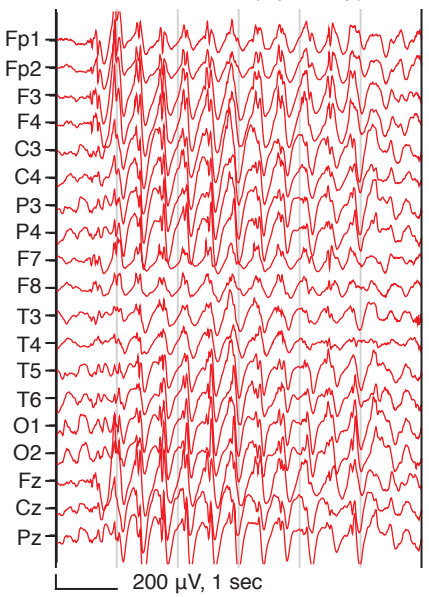**I** Theta (7 yo/wake)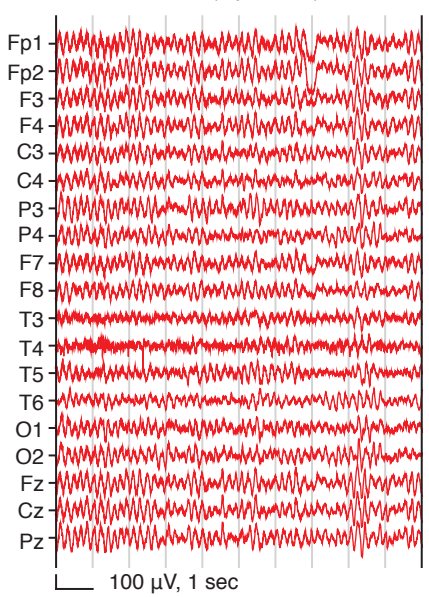

Supplement: MOESM5 [file 12272430]
